# Supplementary material for: Electrophysiological Screening to Assess Foot Drop Syndrome in Severe Acquired Brain Injury in Rehabilitative Settings
Source: MDPI journal article supplement (doi:10.3390/biomedicines12040878), 2024-04-16
Supplement: s1 [file s1]

**Table S 1 :** Demographical and clinical characteristics at admission in IRU and at follow-up in the CIPNM subgroups

|                           | CIM (n = 6)  | CIP (n = 4) |
|---------------------------|--------------|-------------|
| Age (years)               | 64 [41-76]   | 54 [43-75]  |
| Sex (F/M)                 | 2/4          | 4/0         |
| Traumatic aetiology       | 1            | 1           |
| Vascular aetiology        | 5            | 3           |
| Time post-onset (days)    | 57 [26-70]   | 37 [19-41]  |
| Tracheostomy              | 6            | 2           |
| PEG                       | 3            | 0           |
| Nasogastric tube          | 3            | 2           |
| Decompressive Craniectomy | 1            | 0           |
| CRS-R at Admission        | 10.5 [7-21]  | 15 [3-23]   |
| CRS-R at 2 months         | 16 [4-23]    | 20.5 [6-23] |
| LCF at Admission          | 3 [2-5]      | 4 [2-5]     |
| LCF at 2 months           | 4 [2-6]      | 5.5 [2-7]   |
| DRS at Admission          | 22 [18-26]   | 19 [17-26]  |
| DRS at 2 months           | 21.5 [16-24] | 16 [16-24]  |
